# Supplementary material
Source: Springer Nature journal article supplement (https://www.springermedizin.de/resource/supplementary/12963_2011_185_MOESM5_ESM.pdf/9572316)

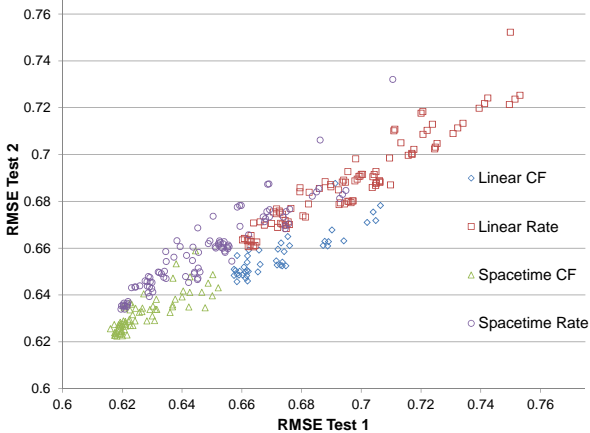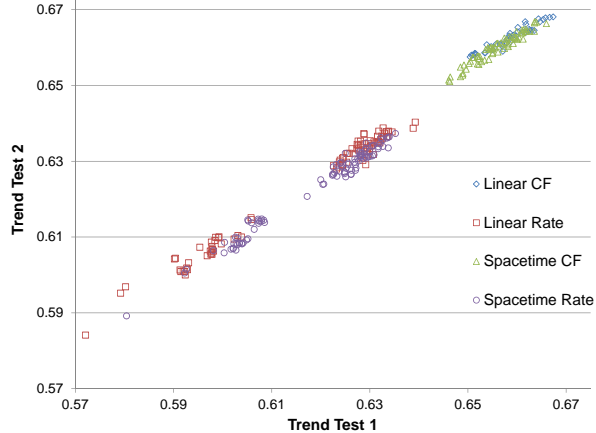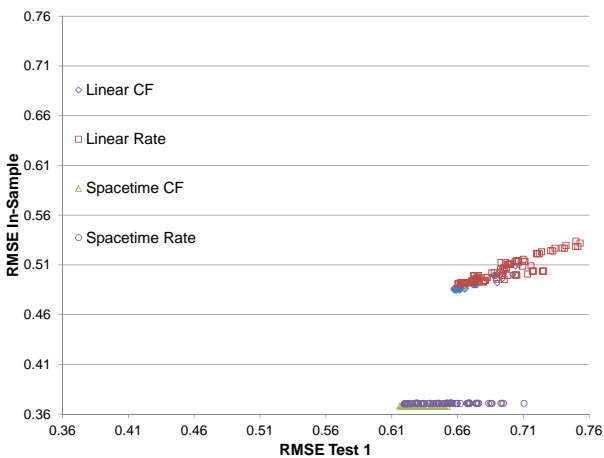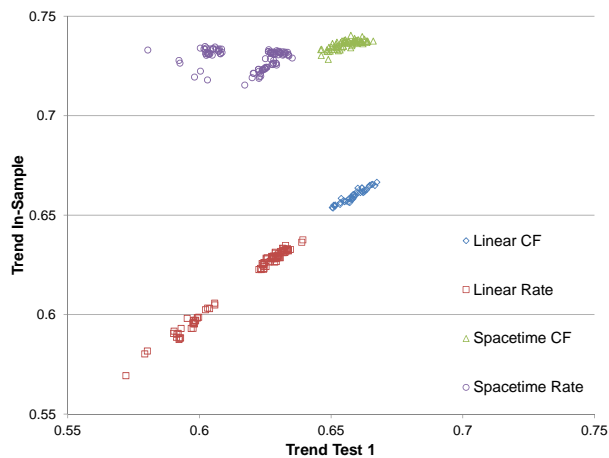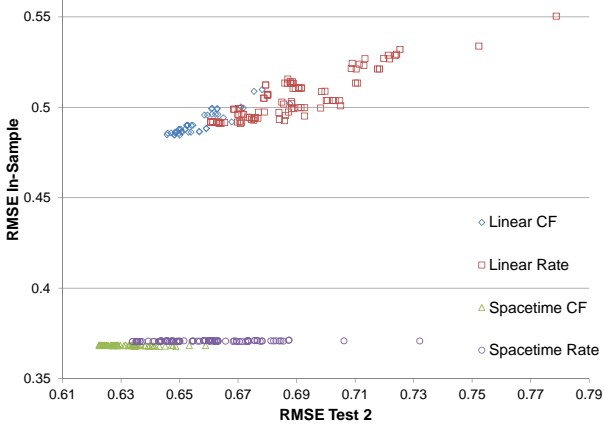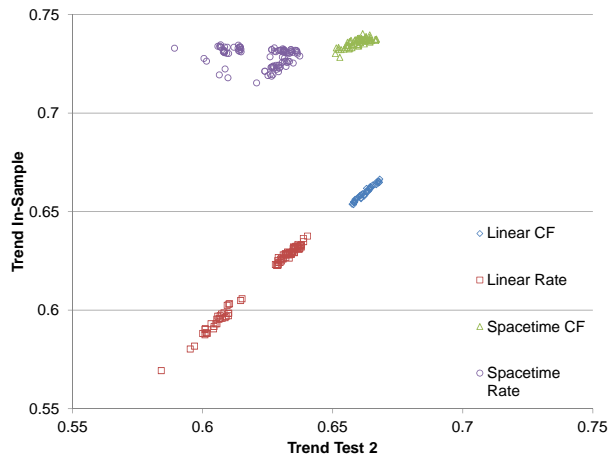

Supplement: MOESM5 [file 9572316]
